# Supplementary material for: Maternal Glycemic Spectrum and Adverse Pregnancy and Perinatal Outcomes in a Multiracial US Cohort
Source: MDPI journal article supplement (doi:10.3390/jcdd9060179), 2022-06-04
Supplement: s1 [file s1]

## Supplementary Tables

**Table S1: Crude and Adjusted Odds Ratios with 95% Confidence Intervals for the Association of Maternal Glycemic Subgroups with Preterm Birth**

| Maternal Glycemic Subgroups | Crude             |                  | Adjusted*         |                  |
|-----------------------------|-------------------|------------------|-------------------|------------------|
|                             | OR [95%CI]        | p-value          | OR [95%CI]        | p-value          |
| T1                          | reference         |                  | reference         |                  |
| T2                          | 1.04 [0.85-1.28]  | 0.678            | 1.06 [0.86-1.30]  | 0.583            |
| T3                          | 1.03 [0.83 -1.28] | 0.759            | 1.04 [0.83 -1.29] | 0.736            |
| Gestational DM              | 1.95 [1.56-2.44]  | <b>&lt;0.001</b> | 2.12 [1.66-2.70]  | <b>&lt;0.001</b> |
| Pregestational DM           | 2.99 [2.29-3.90]  | <b>&lt;0.001</b> | 2.87 [2.16-3.80]  | <b>&lt;0.001</b> |

Preterm birth - gestational age < 37 weeks

T1 – 1h glucose 50-95mg/dl

T2- 1h glucose 96-116mg/dl

T3- 1h glucose 117-201mg/dl

\*adjusted for maternal age, parity, race, educational status, smoking in index pregnancy, body mass index, sex of infant, birth weight

p-value <0.05 -significant

**Table S2: Sensitivity analysis - Crude and Adjusted Odds Ratios with 95% Confidence Intervals for the Association of Maternal Glycemic Subgroups with Spontaneous Preterm Birth**

| Maternal glycemic subgroups | Crude               |                  | Adjusted            |                  |
|-----------------------------|---------------------|------------------|---------------------|------------------|
|                             | OR [95%CI]<br>value | p-               | OR [95%CI]<br>value | p-               |
| T1                          | Ref                 |                  | Ref                 |                  |
| T2                          | 0.95[0.74-1.21]     | 0.67             | 0.98[0.76-1.25]     | 0.87             |
| T3                          | 1.07 [0.83-1.39]    | 0.59             | 1.14[0.87-1.48]     | 0.34             |
| Gestational DM              | 1.87[1.43-2.44]     | <b>&lt;0.001</b> | 2.25[1.68-3.00]     | <b>&lt;0.001</b> |
| Pregestational DM           | 2.15 [1.53-3.01]    | <b>&lt;0.001</b> | 2.26[1.59-3.22]     | <b>&lt;0.001</b> |

T1 – 1h glucose 50-95mg/dl

T2- 1h glucose 96-116mg/dl

T3- 1h glucose 117-201mg/dl

\*adjusted for maternal age, parity, race, educational status, smoking in index pregnancy, body mass index, sex of infant, birth weight

p-value <0.05 -significant

**Table S3: Association of Maternal Glycemic Subgroups with Birth Weight**

| <b>Crude and Adjusted <math>\beta</math>-coefficient ( <math>\beta</math>) and Standard Errors(SE) of the Association of Maternal Glycemic Subgroups with Birth Weight</b> |              |           |                  |                  |           |                  |
|----------------------------------------------------------------------------------------------------------------------------------------------------------------------------|--------------|-----------|------------------|------------------|-----------|------------------|
| <b>Maternal Glycemic Subgroups</b>                                                                                                                                         | <b>Crude</b> |           |                  | <b>Adjusted*</b> |           |                  |
|                                                                                                                                                                            | $\beta$      | SE        | p-value          | $\beta$          | SE        | p-value          |
| T1                                                                                                                                                                         | reference    | reference | reference        | reference        | reference | reference        |
| T2                                                                                                                                                                         | 53.74        | 30.18     | 0.075            | 31.68            | 24.07     | 0.118            |
| T3                                                                                                                                                                         | 166.43       | 32.09     | <b>&lt;0.001</b> | 132.61           | 25.83     | <b>&lt;0.001</b> |
| Gestational DM                                                                                                                                                             | 146.82       | 36.86     | <b>&lt;0.001</b> | 192.89           | 30.70     | <b>&lt;0.001</b> |
| Pregestational DM                                                                                                                                                          | -82.33       | 46.59     | 0.077            | 76.87            | 38.25     | <b>0.045</b>     |

  

| <b>Crude and Adjusted Odds Ratios with 95% Confidence Intervals for the Association of Maternal Glycemic Subgroups with High Birth Weight</b> |                    |                  |                  |                  |
|-----------------------------------------------------------------------------------------------------------------------------------------------|--------------------|------------------|------------------|------------------|
| <b>Maternal Glycemic Subgroups</b>                                                                                                            | <b>Crude</b>       |                  | <b>Adjusted*</b> |                  |
|                                                                                                                                               | OR [95%CI]         | p-value          | OR [95%CI]       | p-value          |
| T1                                                                                                                                            | reference          |                  | Reference        |                  |
| T2                                                                                                                                            | 1.60 [1.09-2.34]   | <b>0.015</b>     | 1.47 [1.01-2.19] | <b>0.044</b>     |
| T3                                                                                                                                            | 1.96[1.33-2.88]    | <b>0.001</b>     | 1.68 [1.13-2.50] | <b>0.010</b>     |
| Gestational DM                                                                                                                                | 3.99 [2.74-5.82]   | <b>&lt;0.001</b> | 3.62 [2.42-5.41] | <b>&lt;0.001</b> |
| Pregestational DM                                                                                                                             | 1.88 [1.11 – 3.18] | <b>0.018</b>     | 1.89 [1.09-3.28] | <b>0.019</b>     |

High birth weight – birth weight  $\geq 4000\text{g}$

T1 – 1h glucose 50-95mg/dl

T2- 1h glucose 96-116mg/dl

T3- 1h glucose 117-201mg/dl

\*adjusted for maternal age, parity, race, educational status, smoking in index pregnancy, body mass index, sex of infant and preterm birth

p-value  $<0.05$  -significant

**Table S4: Crude and Adjusted Odds Ratios with 95% Confidence Intervals for the Association of Maternal Glycemic Subgroups with Cesarean section**

| Maternal Glycemic Subgroups | Crude             |                  | Adjusted*         |                  |
|-----------------------------|-------------------|------------------|-------------------|------------------|
|                             | OR [95%CI]        | p-value          | OR [95%CI]        | p-value          |
| T1                          | reference         |                  | reference         |                  |
| T2                          | 1.26 [1.06-1.50]  | <b>0.010</b>     | 1.16 [0.97 -1.39] | 0.106            |
| T3                          | 1.24 [1.03- 1.49] | <b>0.022</b>     | 1.06 [0.87 -1.28] | 0.560            |
| Gestational DM              | 2.30 [1.87 -2.82] | <b>&lt;0.001</b> | 1.63 [1.31-2.02]  | <b>&lt;0.001</b> |
| Pregestational DM           | 3.24 [2.50-4.20]  | <b>&lt;0.001</b> | 2.20 [1.68-2.89]  | <b>&lt;0.001</b> |

T1 – 1h glucose 50-95mg/dl

T2- 1h glucose 96-116mg/dl

T3- 1h glucose 117-201mg/dl

\*adjusted for maternal age, parity, race, educational status, smoking in index pregnancy, body mass index, sex of infant, preterm birth

p-value <0.05 -significant

**Table S5: Crude and Adjusted Odds Ratios with 95%CI for the Association of Maternal Glycemic Subgroups with Preterm Birth among NHB, Hispanic and Women of Other Race-ethnicities**

| Maternal Glycemic Subgroups                        | Crude             |                  | Adjusted*         |                  |
|----------------------------------------------------|-------------------|------------------|-------------------|------------------|
|                                                    | OR [95% CI]       | p-value          | OR [95% CI]       | p-value          |
| <b>Non-Hispanic Black women</b>                    |                   |                  |                   |                  |
| T1                                                 | 1.00 [Ref]        |                  | 1.00 [Ref]        |                  |
| T2                                                 | 1.08 [0.79-1.47]  | 0.648            | 1.10 [0.80-1.52]  | 0.550            |
| T3                                                 | 0.92 [0.65- 1.32] | 0.657            | 0.93 [0.64-1.34]  | 0.692            |
| Gestational DM                                     | 1.54 [1.03-2.30]  | <b>0.036</b>     | 1.65 [ 1.07-2.55] | <b>0.024</b>     |
| Pregestational DM                                  | 3.73 [2.43-5.74]  | <b>&lt;0.001</b> | 3.66 [2.31-5.80]  | <b>&lt;0.001</b> |
| <b>Hispanic women</b>                              |                   |                  |                   |                  |
| T1                                                 | 1.00 [Ref]        |                  | 1.00 [Ref]        |                  |
| T2                                                 | 0.89[0.53-1.52]   | 0.680            | 0.86 [0.51-1.49]  | 0.610            |
| T3                                                 | 0.76[0.42-1.36]   | 0.352            | 0.79[0.44-1.42]   | 0.430            |
| Gestational DM                                     | 2.04 [1.22-3.39]  | <b>0.006</b>     | 2.09 [1.19-3.68]  | <b>0.010</b>     |
| Pregestational DM                                  | 2.75 [1.48-5.11]  | <b>0.001</b>     | 2.68[1.37-5.24]   | <b>0.004</b>     |
| <b>Women of other race-ethnicities<sup>†</sup></b> |                   |                  |                   |                  |
| T1                                                 | 1.00 [Ref]        |                  | 1.00 [Ref]        |                  |
| T2                                                 | 1.08[0.79-1.46]   | 0.627            | 1.10[0.81-1.51]   | 0.528            |
| T3                                                 | 1.23[0.90-1.68]   | 0.185            | 1.25[0.92-1.72]   | 0.170            |
| Gestational DM                                     | 2.19[1.57-3.06]   | <b>&lt;0.001</b> | 2.40[1.69-3.43]   | <b>&lt;0.001</b> |
| Pregestational DM                                  | 2.54[1.68-3.87]   | <b>&lt;0.001</b> | 2.35[1.52-3.64]   | <b>&lt;0.001</b> |

Preterm birth - gestational age < 37 weeks

T1 – 1h glucose 50-95mg/dl

T2- 1h glucose 96-116mg/dl

T3- 1h glucose 117-201mg/dl

\*adjusted for maternal age, educational status, parity, smoking in index pregnancy, body mass index, sex of infant, birth weight

<sup>†</sup>Other race-ethnicities include non-Hispanic White and Asian

**Table S6: Crude and Adjusted  $\beta$ -coefficient and Standard Errors (SE) for the Association of Maternal Glycemic Subgroups with Birth Weight among NHB, Hispanic and Women of Other Race-ethnicities**

| Maternal Glycemic Subgroups                        | Crude     |        |              | Adjusted* |       |                  |
|----------------------------------------------------|-----------|--------|--------------|-----------|-------|------------------|
|                                                    | $\beta$   | SE     | p-value      | $\beta$   | SE    | p-value          |
| <b>Non-Hispanic Black women</b>                    |           |        |              |           |       |                  |
| T1                                                 | Reference |        |              | Reference |       |                  |
| T2                                                 | 38.44     | 49.17  | 0.434        | 29.53     | 37.67 | 0.433            |
| T3                                                 | 177.73    | 54.37  | <b>0.001</b> | 127.88    | 42.15 | <b>0.002</b>     |
| Gestational DM                                     | 140.58    | 67.62  | <b>0.038</b> | 172.47    | 53.60 | <b>0.001</b>     |
| Pregestational DM                                  | -160.23   | 78.66  | <b>0.042</b> | 96.25     | 62.20 | 0.122            |
| <b>Hispanic women</b>                              |           |        |              |           |       |                  |
| T1                                                 | Reference |        |              | Reference |       |                  |
| T2                                                 | 77.03     | 75.50  | 0.308        | 54.49     | 63.89 | 0.394            |
| T3                                                 | 231.30    | 80.66  | <b>0.004</b> | 175.65    | 68.07 | <b>0.010</b>     |
| Gestational DM                                     | 203.70    | 79.53  | <b>0.011</b> | 218.53    | 72.56 | <b>0.003</b>     |
| Pregestational DM                                  | 43.12     | 102.12 | 0.673        | 114.01    | 90.12 | 0.206            |
| <b>Women of Other Race-ethnicities<sup>†</sup></b> |           |        |              |           |       |                  |
| T1                                                 | Reference |        |              | Reference |       |                  |
| T2                                                 | 49.67     | 44.39  | 0.263        | 33.54     | 35.79 | 0.349            |
| T3                                                 | 126.17    | 45.92  | <b>0.006</b> | 126.88    | 37.32 | <b>0.001</b>     |
| Gestational DM                                     | 92.16     | 53.94  | 0.088        | 174.62    | 44.69 | <b>&lt;0.001</b> |
| Pregestational DM                                  | -93.80    | 70.34  | 0.182        | 39.63     | 57.94 | 0.494            |

T1 – 1h glucose 50-95mg/dl

T2- 1h glucose 96-116mg/dl

T3- 1h glucose 117-201mg/dl

\*adjusted for maternal age, educational status, parity, smoking in index pregnancy, body mass index, sex of infant, preterm birth

p-value <0.05 -significant

<sup>†</sup>Other race-ethnicities include non-Hispanic White and Asian

**Table S7: Crude and Adjusted Odds Ratios with 95%CI for the Association of Maternal Glycemic Subgroups with High Birth Weight among NHB, Hispanic and Women of Other Race-Ethnicities**

| Maternal Glycemic Subgroups                        | Crude             |                  | Adjusted*        |                  |
|----------------------------------------------------|-------------------|------------------|------------------|------------------|
|                                                    | OR [95% CI]       | p-value          | OR [95% CI]      | p-value          |
| <b>Non-Hispanic Black women</b>                    |                   |                  |                  |                  |
| T1                                                 | 1.00 [Ref]        |                  | 1.00 [Ref]       |                  |
| T2                                                 | 1.74[0.96-3.16]   | 0.070            | 1.67 [0.90-3.08] | 0.101            |
| T3                                                 | 2.64 [1.45-4.79]  | <b>0.001</b>     | 2.01 [1.08-3.74] | <b>0.028</b>     |
| Gestational DM                                     | 4.79 [2.58-8.92]  | <b>&lt;0.001</b> | 3.87 [1.97-7.59] | <b>&lt;0.001</b> |
| Pregestational DM                                  | 1.70[0.70-4.15]   | 0.244            | 1.85 [0.72-4.76] | 0.201            |
| <b>Hispanic women</b>                              |                   |                  |                  |                  |
| T1                                                 | 1.00 [Ref]        |                  | 1.00 [Ref]       |                  |
| T2                                                 | 1.72 [0.57-5.13]  | 0.334            | 1.47[0.48-4.52]  | 0.498            |
| T3                                                 | 2.54 [ 0.86-7.49] | 0.092            | 2.31[ 0.77-7.00] | 0.137            |
| Gestational DM                                     | 4.92 [1.80-13.41] | <b>0.002</b>     | 3.97[1.36-11.74] | <b>0.012</b>     |
| Pregestational DM                                  | 3.58 [1.09-11.74] | <b>0.035</b>     | 3.15[0.89-11.17] | 0.075            |
| <b>Women of other race-ethnicities<sup>†</sup></b> |                   |                  |                  |                  |
| T1                                                 | 1.00 [Ref]        |                  | 1.00 [Ref]       |                  |
| T2                                                 | 1.48[0.85-2.57]   | 0.168            | 1.37[0.78-2.41]  | 0.273            |
| T3                                                 | 1.43[0.80-2.53]   | 0.224            | 1.29[0.72-2.33]  | 0.394            |
| Gestational DM                                     | 3.32[1.91-5.79]   | <b>&lt;0.001</b> | 3.17[1.76-5.70]  | <b>&lt;0.001</b> |
| Pregestational DM                                  | 1.46[0.63-3.35]   | 0.375            | 1.40[0.59-3.37]  | 0.447            |

High birth weight - BW ≥4000g

T1 – 1h glucose 50-95mg/dl

T2- 1h glucose 96-116mg/dl

T3- 1h glucose 117-201mg/dl

\*adjusted for maternal age, educational status, parity, smoking in index pregnancy, body mass index, sex of infant, preterm

p-value <0.05 -significant

<sup>†</sup>Other race-ethnicities include non-Hispanic White and Asian

**Table S8: Crude and Adjusted Odds Ratios with 95%CI for the Association of Maternal Glycemic Subgroups with Cesarean Section among NHB, Hispanic and Women of Other Race-ethnicities.**

| Maternal Glycemic Subgroups            | Crude              |                  | Adjusted*         |                  |
|----------------------------------------|--------------------|------------------|-------------------|------------------|
|                                        | OR [95% CI]        | p-value          | OR [95% CI]       | p-value          |
| <b>Non-Hispanic Black women</b>        |                    |                  |                   |                  |
| T1                                     | 1.00 [Ref]         |                  | 1.00 [Ref]        |                  |
| T2                                     | 1.17 [0.89-1.55]   | 0.254            | 1.09 [0.82 -1.44] | 0.566            |
| T3                                     | 1.19 [0.87-1.61]   | 0.273            | 1.04 [0.76 -1.43] | 0.789            |
| Gestational DM                         | 2.00 [ 1.39-2.88]  | <b>&lt;0.001</b> | 1.55 [1.06-2.27]  | <b>0.024</b>     |
| Pregestational DM                      | 3.08 [2.02 – 4.70] | <b>&lt;0.001</b> | 2.12 [1.36-3.30]  | <b>0.001</b>     |
| <b>Hispanic women</b>                  |                    |                  |                   |                  |
| T1                                     | 1.00 [Ref]         |                  | 1.00 [Ref]        |                  |
| T2                                     | 1.28 [ 0.81-2.03]  | 0.283            | 1.10[0.69-1.77]   | 0.685            |
| T3                                     | 1.47 [0.91-2.38]   | 0.120            | 1.37[0.83-2.26]   | 0.225            |
| Gestational DM                         | 1.51 [0.94-2.43]   | 0.091            | 0.95 [0.55-1.62]  | 0.841            |
| Pregestational DM                      | 3.92 [2.14-7.18]   | <b>&lt;0.001</b> | 2.68 [1.40-5.15]  | <b>0.003</b>     |
| <b>Women of other race-ethnicities</b> |                    |                  |                   |                  |
| T1                                     | 1.00 [Ref]         |                  | 1.00[Ref]         |                  |
| T2                                     | 1.32[1.02-1.72]    | <b>0.035</b>     | 1.24[0.95-1.63]   | 0.112            |
| T3                                     | 1.22[0.93-1.60]    | 0.152            | 1.03[0.77-1.36]   | 0.841            |
| Gestational DM                         | 3.17[2.33-4.32]    | <b>&lt;0.001</b> | 2.32[1.68-3.21]   | <b>&lt;0.001</b> |
| Pregestational DM                      | 3.08[2.076-4.58]   | <b>&lt;0.001</b> | 2.14[1.41-3.25]   | <b>&lt;0.001</b> |

T1 – 1h glucose 50-95mg/dl

T2- 1h glucose 96-116mg/dl

T3- 1h glucose 117-201mg/dl

\*adjusted for maternal age, educational status, parity, smoking in index pregnancy, body mass index, sex of infant, birth weight, preterm birth

p-value <0.05 -significant
